# Supplementary material for: Folate regulates RNA m5C modification and translation in neural stem cells
Source: PubMed Central journal article supplement (PMC9686110; doi:10.1186/s12915-022-01467-0), 2022-11-23

Additional file 8: original uncropped blot images (related to Fig. S5).

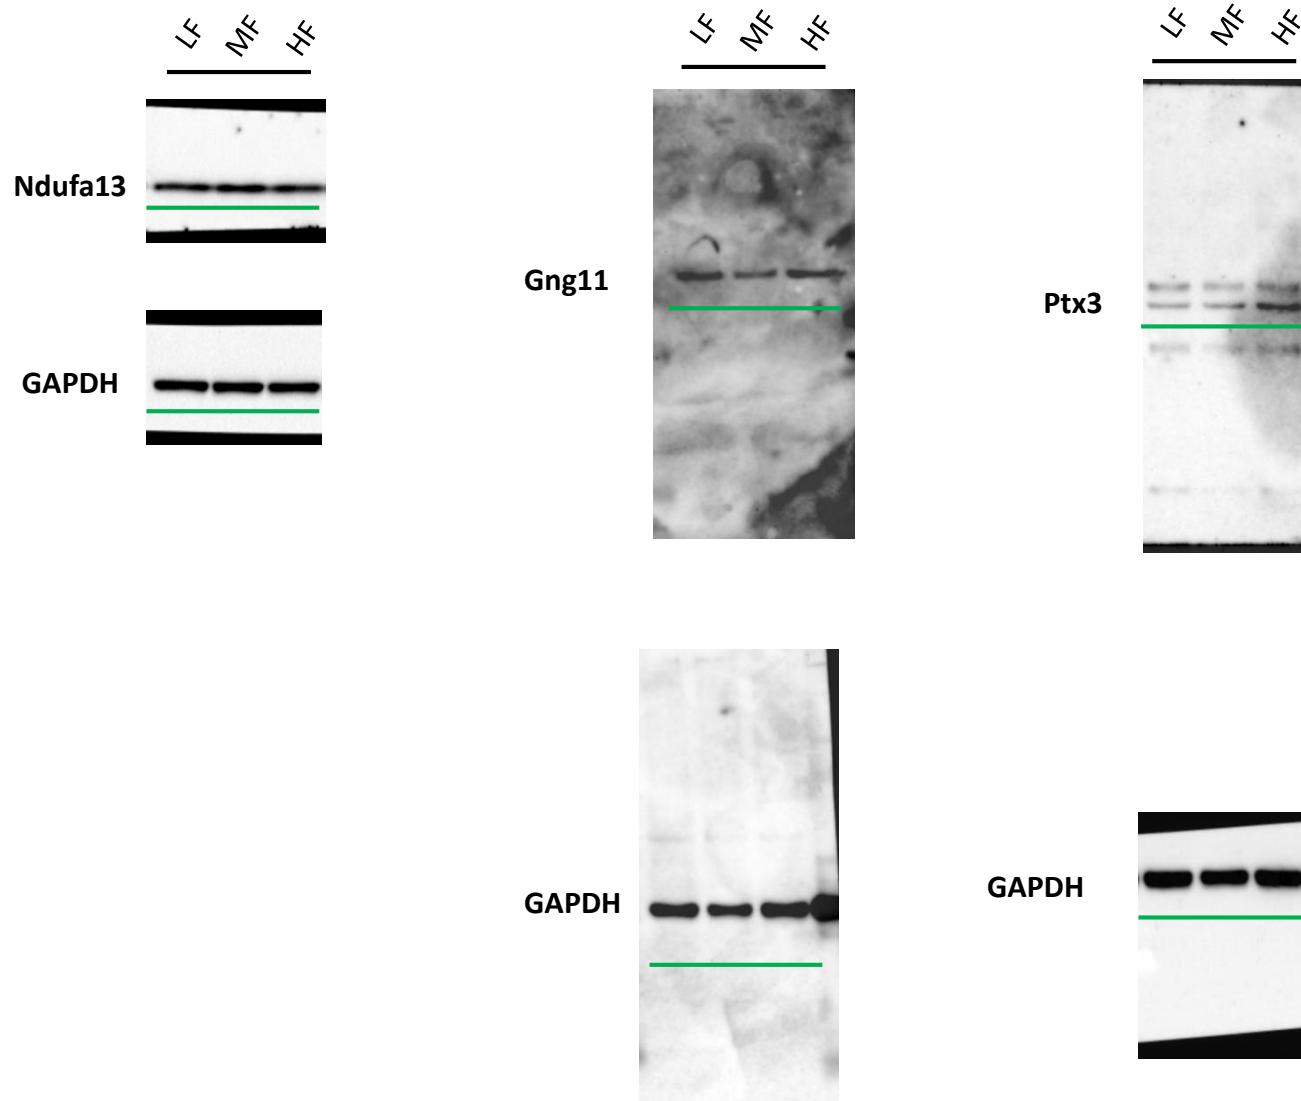

Supplement: 12915_2022_1467_MOESM8_ESM.pdf [file 12915_2022_1467_MOESM8_ESM.pdf]
